# Supplementary material for: A New Hadrosauroid Dinosaur from the Early Late Cretaceous of Shanxi Province, China
Source: PLoS One. 2013 Oct 18;8(10):e77058. doi: 10.1371/journal.pone.0077058 (PMC3800054; doi:10.1371/journal.pone.0077058)
Supplement: Supporting Information S1 — Data Matrix.tnt. (TNT) [file pone.0077058.s001.tnt]

xread
138 38
Hypsilophodon	00011000000000100000000000000000000011000000000000010000000000000100000000000000000000000000000000000000000000?000000000000000001000000000
Iguanodon	000000000000001000000000000000000000000000000000000000001000000000000000000000000000000001000000000000000000000000000100000000000000000000
Ouranosaurus	0000?0000000011000000000000000000000110?0?0?0001?0000000000000000000????100?0001000?00?0000000?00?0?0001000000000?0001000000000?0000000?00
Fukuisaurus	000100????????????????????????????1??????????10??0101000?000000?001?????????00000??000?000?000000000??????????????????????????????????????
Altirhinus	0000000001000100000000001000000000000????????1000000000000000000000??????00?00100?000000000010000000?????000000000000110000000001?0????00?
Eolambia	000100000?000??0????????100000000000?101??0?0100??1110?0?000000??000????011???0000000000000000010000????0??????0010??0??00000???01000???0?
Probactrosaurus	000000000?0000????000???0000000000?001010?0?0100?0000010?0000000000????0011?0000001000?0010001010000001000000000010?111?0000010000000??000
Equijubus	00???0000?00001000000000?00000?000000?????0??10?000????010000000000????0?11?00010??000?001000000000001100???????????????0000??????????????
Protohadros	101000000?000000000000???00000?00010?????????100?1100010?000000?110??????11?001100100010010111?10000?????????????????????????????????????0
Telmatosaurus	00010000000000000000000000000000001000000000010000110111100000001101000?0110??0111110000110010010010?110?10?00?001????????????????1??????0
Bactrosaurus	00010000010000000000000010000?000000100100000100011100111000000011111001011?1000001000?0110011010010?11001000000010?1???0000010110110??010
Levnesovia	????????????????????????100000000000100100000?0?01110011?000000011111001011?100000100000110011010010?1100??000?001??1??000??0101??110??010
Tanius	????????????????????????0?????0000?0100100000??????????1?0000000?1?11001011?????????????????????????1111?11????0010?????00000?????110???10
Aralosaurus	????????00000?????0001111100000000101101110001010011011101?1110011?110010??????????????????010111110???????????001????????????????1?????1?
Tsintaosaurus	100001?001001????01020000000100101101100100011011?11011?????1???10110010011?1111101111??11111111111110111101111111??1?0?1110100?11110??110
Jaxartosaurus	?????????010?????????000000110011110110010000??????????????????0???110110?1???????????????????????????????????????????????????????????????
Nipponosaurus	???????11?111??????????????????????010?0?????1????2??11111112210????1??1????????1??111??111?111111102111?11111???1?11211111?????1111??1110
Amurosaurus	??????????1??????????????00111011110111021101?111?211111?1111110111110110111??11111111?11?1111111111?110?1011111011?1???111?110111110??110
Lambeosaurus	101001011211110000211000000111111110111021111111112111111111111011111011111111111111111111111111111121111111111111111211111111011111011110
Corythosaurus	101001011211110000222000000111111110111021111111112111111111111011111011111111111111111111111111111121111111111111111211111111011111011110
Hypacrosaurus	10100101121111000022200000011111111011102111111111211111111121101111101111111111111111111111111111112111111111111111?211111111111111011110
Olorotitan	10?00?01121?111000?1?00000011?11111011102?1?1111112?111?111111101?11?0?1????111111??11?11?1111????112111111111111?11?2??111?????111?0????0
Parasaurolophus	101001010210111000100000000111212111111021111111102111111101111011111011111111011111111111111111111111111111111110011211111111111111111?10
Charonosaurus	??????????1?????????????????1?2121111110?1111?111?211111?111111011111011?11???111?1111?11?1111??1111?111110111111?1?1???11111?1??1111??110
Lophorhothon	?????????1000??1110001211000000000?010??00001?0??01????1?00????01?1?10110?1??????????????????1010010???????????????????????????11?????1?1?
Kritosaurus	1111011000000?1111000121?00000010010100110001110001101110101111011111?111???11011?111111111111110110?110??0?11?101??????1110110???1??1111?
Maiasaura	1111111000000001110001120010000000101001100?11100011011101011211111110111111110111111111111111110110101011011101011112?1111111011211011111
Brachylophosaurus	1111111000000101110001110010000000101001100011100111011101011211111110111111110111111111111111110110101011111101011112?1111011011211011111
Gryposaurus	121111100000011111000121010000000010100110001110001101110101121011111111111111011111111111111111011011101101110101011201111111011211011110
Kerberosaurus	?????????????1?121000000?1000001001??001?00??1100?110111?101111?1111?1???1?????????????????1???????0????????11???????????????????????????0
Saurolophus	12001110020?011122000121001000010010100120011110001101111101111111110111111111011111111111111111011011101101110101011211111010011211011110
Prosaurolophus	1201111001000111220001210100000100101001100111100011011101011111111111111111110111111111111111110110111011111101010112?1111111011211011110
Edmontosaurus	1211111001000111210000000100000000101001100111100?11011101011111111111111111110111111111111111110110111011111101010112?1111111011211011110
K._australis	?????1????00??????000????00???0100101001?00??1??0?11??????????????????1?1?1?0?10???????????1111??????????101110?????????11111001101???????
Jintasaurus	??????????????????????????????0000?0100110000??????????????????0???010000010??????????????????????????????????????????????????????????????
Yunganglong	?????????????????????????????????????0?????????????????????????????11000??1???????????????????????????1??????????????????????????001??????
Nanyangosaurus	????????????????????????????????????????????????????????????????????????????????????????????????????????0??????0010?120?????????001???0?1?
Shuangmiaosaurus	??????????????????????????????????????????????0???20101???????????????????????00001002?????01111??????????????????????????????????????????
;

tread
(0 (2 (1 (4 ((3 5) (6 (7 (8 (34 (35 ((9 (13 ((14 (15 (17 ((21 (18 (19 (16 20)))) (22 23))))) (24 (25 ((26 27) (28 ((29 32) (31 (30 33)))))))))) (12 (10 11)))))))))))))*
(0 (2 (1 (4 ((3 5) (7 (6 (34 (35 (8 (10 (11 ((9 12) (13 ((14 (15 (17 ((21 (18 (19 (16 20)))) (22 23))))) (24 (25 ((26 27) (28 ((29 32) (31 (30 33))))))))))))))))))))))*
(0 (2 (1 (4 ((3 5) (6 (7 (34 (35 (8 ((9 (13 ((14 (15 (17 ((21 (18 (19 (16 20)))) (22 23))))) (24 (25 ((26 27) (28 ((29 32) (31 (30 33)))))))))) (12 (10 11)))))))))))))*
(0 (2 (1 (4 ((3 5) (7 (6 (34 (35 (8 ((9 (13 ((14 (15 (17 ((21 (18 (19 (16 20)))) (22 23))))) (24 (25 ((26 27) (28 ((29 32) (31 (30 33)))))))))) (12 (10 11)))))))))))))*
(0 (2 (1 (4 ((3 5) (6 7 (8 34 35 (9 10 11 12 (13 ((14 (15 (17 ((21 (18 (19 (16 20)))) (22 23))))) (24 (25 ((26 27) (28 ((29 32) (31 (30 33)))))))))))))))))*
(0 (2 (1 (4 ((3 5) (6 7 (34 (8 35 (12 (9 (13 ((14 (15 (17 ((21 (18 (19 (16 20)))) (22 23))))) (24 (25 ((26 27) (28 ((29 32) (31 (30 33)))))))))) (10 11))))))))))*
(1 (6 7 (34 (8 35 (12 (9 13) (10 11))))))*
;


proc /;
comments 0
;
